# Supplementary material for: Chronic Intermittent Hypoxia Exposure Alternative to Exercise Alleviates High-Fat-Diet-Induced Obesity and Fatty Liver
Source: MDPI journal article supplement (doi:10.3390/ijms23095209), 2022-05-06
Supplement: s1 [file s1]

Supplemental material

Figure S1. The H&E staining of heart, lung and kidney tissues.

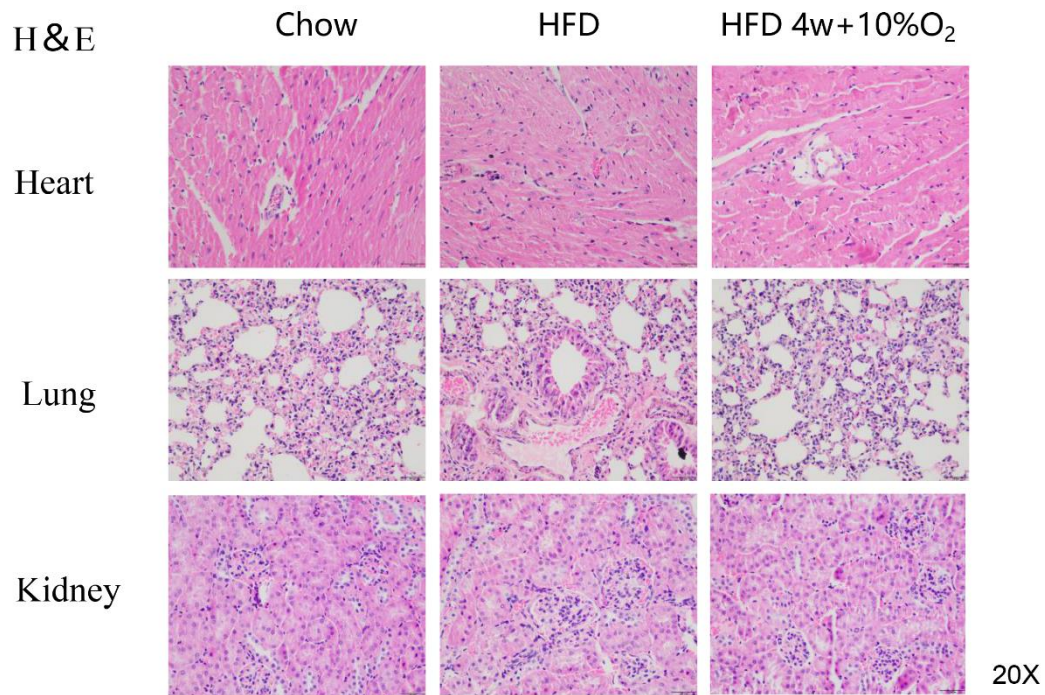

Table S1. RT-PCR primers

|                        |                                 |
|------------------------|---------------------------------|
| 18S rRNA-Forward       | 5'-GCAATTATTCCCCATGAACG -3'     |
| 18S rRNA-Reverse       | 5'-GGCCTCACTAAACCATCCAA-3'      |
| SCD1-Forward           | 5'-TTCTTGCGATACTCTGGTGC-3'      |
| SCD1-Reverse           | 5'-CGGGATTGAATGTTCTTGTCGT-3'    |
| Cpt1a-Forward          | 5'-CTCCGCCTGAGCCATGAAG-3'       |
| Cpt1a-Reverse          | 5'-CACCAGTGATGATGCCATTCT-3'     |
| PGC1 $\alpha$ -Forward | 5'-TATGGAGTGACATAGAGTGTGCT-3'   |
| PGC1 $\alpha$ -Reverse | 5'-CCACTTCAATCCACCCAGAAAG-3'    |
| Atgl-Forward           | 5'-GGATGGCGGCATTTTCAGACA-3'     |
| Atgl-Reverse           | 5'-CAAAGGGTTGGGTTGGTTCAG-3'     |
| PPAR $\alpha$ -Forward | 5'-TTCTTGCGATACTCTGGTGC-3'      |
| PPAR $\alpha$ -Reverse | 5'-CGACAGACAGGCACTTGTGAAA-3'    |
| UCP1-Forward           | 5'-AGGCTTCCAGTACCATTAGGT-3'     |
| UCP1-Reverse           | 5'- CTGAGTGAGGCAAAGCTGATTT-3'   |
| ADR3-Forward           | 5'- ACTTGGTAGTGGGACTCCTCG T -3' |
| ADR3-Reverse           | 5'- TGCTGGCAGTTACAC AGAGC -3'   |
| arginase-Forward       | 5'- CTCCAAGCCAAAGTCCTTAGAG -3'  |

---

|                     |                                |
|---------------------|--------------------------------|
| arginase -Reverse   | 5'- AGGAGCTGTCATTAGGGACATC -3' |
| CD206 -Forward      | 5'- TGGAAGAAGAAGTAGCCTATC -3'  |
| CD206 -Reverse      | 5'- TGGAGTAGTGGTTGGAGAA -3'    |
| UCP2--Forward       | 5'- ATGGTTGGTTTCAAGGCCACA-3'   |
| UCP2--Reverse       | 5'-CGGTATCCAGAGGGAAAGTGAT-3'   |
| adiponectin-Forward | 5'-TGTCCTCTTAATCCTGCCCA-3'     |
| adiponectin-Reverse | 5'-CCAACCTGCACAAGTTCCCTT-3'    |
| C/EBP-Forward       | 5'-CAAGAACAGCAACGAGTACCG-3'    |
| C/EBP-Reverse       | 5'-GTCACTGGTCAACTCCAGCAC-3'    |

---
